1 **Title**

2 A touch of hierarchy. Population Receptive Fields reveal fingertip integration in Brodmann  
3 areas in human primary somatosensory cortex.

4

5 **Authors**

6 W. Schellekens<sup>1</sup>, M. Thio<sup>1</sup>, S. Badde<sup>2</sup>, J. Winawer<sup>2</sup>, N. Ramsey<sup>3</sup>, N. Petridou<sup>1</sup>

7

8 **Affiliations**

9 1: Department of Radiology, Center for Image Sciences, UMC Utrecht, Utrecht, Netherlands

10 2: Department of Psychology & Center of Neural Science, NYU, New York, USA

11 3: Department of Neurology & Neurosurgery, UMC Utrecht, Utrecht, Netherlands

12

13 **Corresponding author**

14 W. Schellekens

15 Postal address:

16 Q101.132, P.O.Box 85500, 3508 GA, Utrecht, Netherlands

17 e-mail address:

18 [w.schellekens@umcutrecht.nl](mailto:w.schellekens@umcutrecht.nl)

19

20 **Abstract**

21 Several neuroimaging studies have shown the somatotopy of body part representations in  
22 primary somatosensory cortex (S1), but the functional hierarchy of distinct subregions in  
23 human S1 has not been adequately addressed. The current study investigates the functional  
24 hierarchy of cyto-architectonically distinct regions, Brodmann areas BA3, BA1, and BA2, in  
25 human S1. During functional MRI experiments, we presented participants with vibrotactile  
26 stimulation of the fingertips at 3 different vibration frequencies. Using population Receptive  
27 Field (pRF) modeling of the fMRI BOLD activity, we identified the hand region in S1 and the  
28 somatotopy of the fingertips. For each voxel, the pRF center indicates the finger that most  
29 effectively drives the BOLD signal, and the pRF size measures the spatial somatic pooling of  
30 fingertips. We find a systematic relationship of pRF sizes from lower-order areas to higher-  
31 order areas. Specifically, we found that pRF sizes are smallest in BA3, increase slightly  
32 towards BA1, and are largest in BA2, paralleling the increase in visual receptive field size as  
33 one ascends the visual hierarchy. Additionally, we find that the time-to-peak of the  
34 hemodynamic response in BA3 is roughly 0.5s earlier compared to BA1 and BA2, further  
35 supporting the notion of a functional hierarchy of subregions in S1. These results were  
36 obtained during stimulation of different mechanoreceptors, suggesting that different afferent  
37 fibers leading up to S1 feed into the same cortical hierarchy.

38 **Keywords**

39 Somatosensory; S1; fMRI; pRF; hierarchy; vibrotactile

## 40 Introduction

41 Touch is an important source of information on our direct surroundings. We use touch  
42 information to explore objects and surfaces and touch plays a major part in haptic processes  
43 such as tool use. The loss of adequate touch signal processing, e.g. due to stroke, frequently  
44 leads to severe impairments affecting many facets of everyday life. Hence, understanding  
45 somatosensory processes in the human brain following cutaneous touch signals is relevant  
46 to many scientific areas ranging from fundamental neuroscience to the deciphering of  
47 neurological disorders of the somatosensory system. Imaging studies in humans have mostly  
48 addressed the somatotopic organization of the hand and fingers (Maldjian et al. 1999; Kurth  
49 et al. 2000; Hlustik et al. 2001; Blankenburg et al. 2003; Nelson and Chen 2008; Schweizer  
50 et al. 2008; Sanchez-Panchuelo et al. 2010; Ann Stringer et al. 2014; Martuzzi et al. 2014;  
51 Choi et al. 2016; Kikkert et al. 2016; Kolasinski et al. 2016; Sanchez Panchuelo et al. 2018;  
52 Da Rocha Amaral et al. 2019; Puckett et al. 2020), and the whole body (Akselrod et al. 2017;  
53 Tal et al. 2017). However, other functional characteristics of human S1 have not received  
54 equal attention. Specifically, the processing hierarchy of cyto-architectonically distinct regions  
55 in human S1, i.e. Brodmann areas BA3a/b, BA1, and BA2, (Brodmann 1909; Geyer et al.  
56 1999), has been investigated structurally in humans (Sánchez-Panchuelo et al. 2014;  
57 Wagstyl et al. 2015), but not from a functional perspective. In the current study, we  
58 investigate the functional hierarchy in human S1 by estimating the integration of somatic  
59 information in different Brodmann areas.

60 When cortical information is processed at different hierarchical levels, information  
61 from multiple lower-level sources is integrated at the higher-order level. As a result, regions  
62 of higher hierarchical order contain neurons that exhibit larger or more complex receptive  
63 fields, meaning that neurons are responsive to more input or specific combinations of input.  
64 Functional hierarchy among separate S1 regions in humans can, therefore, potentially be  
65 revealed through a form of spatial somatosensory information integration (Hubel and Wiesel  
66 1968; Duffy and Burchfiel 1971; Van Essen and Maunsell 1983). Previous animal studies  
67 have reported that BA3b is the primary target of thalamic output from the ventrolateral and  
68 ventroposterior nucleus (Jones and Powell 1970; Chung et al. 1986; Miller et al. 2001), which  
69 then projects onwards to BA1 and BA2 (Friedman 1983; Felleman and Van Essen 1991;  
70 Kaas 1993; Iwamura 1998). As a result, neuronal receptive fields, as reported in animal  
71 studies, are smallest in BA3b and increase in size in BA1, BA2 and beyond (Armstrong-  
72 James 1975; Hyvärinen and Poranan 1978; Sur et al. 1980; DiCarlo et al. 1998). In humans,  
73 receptive field properties of individual neurons cannot easily be assessed in healthy  
74 volunteers under normal circumstances. However, average receptive field properties of small  
75 neuronal populations (e.g. neurons inside a single MRI-voxel) can be estimated using a

76 Gaussian population Receptive Field (pRF) model. pRF modeling was originally developed  
77 for vision (Dumoulin and Wandell 2008), where it has exposed hierarchical processing  
78 characteristics as well as other traits of the human visual system (Harvey and Dumoulin  
79 2011; Haak et al. 2012; Dumoulin et al. 2014; Klein et al. 2014; Wandell and Winawer 2015;  
80 Merkel et al. 2018; Welbourne et al. 2018). Furthermore, two recent functional MRI (fMRI)  
81 studies have shown that pRF modeling can also be used to describe the average receptive  
82 field properties of small neuronal populations in human S1 (Schellekens et al. 2018; Puckett  
83 et al. 2020). Even though some studies find evidence consistent with hierarchical  
84 organization of somatosensory processing in humans (Bodegård et al. 2001; Van Boven et  
85 al. 2005; Dijkerman and de Haan 2007; Kim et al. 2015; Whitehead et al. 2019), the extent of  
86 spatial integration across different Brodmann areas in human S1 is presently not well  
87 defined.

88         The current objective is to estimate pRF properties across Brodmann areas, following  
89 vibrotactile stimulation of the fingertips. Vibrotactile stimulation can be signaled by two  
90 distinct cutaneous mechanoreceptors: Meissner corpuscles and Pacinian corpuscles,  
91 depending on the frequency of vibration (Mountcastle et al. 1972; Bolanowski et al. 1988;  
92 Pasterkamp 1999). Meissner corpuscles typically show a peak activity for flutter frequencies  
93 (i.e. between 10 Hz and 50 Hz), while Pacinian corpuscles respond to higher frequencies  
94 with a preference around 250 Hz (Rowe 2002). Furthermore, previous studies showed that  
95 Meissner and Pacinian corpuscles signal somatosensory information through different  
96 pathways, i.e. Rapid-Adapting (RA) and Pacinian pathways (Vallbo and Johansson 1984;  
97 Gescheider et al. 2004; Harvey et al. 2013; Saal et al. 2015), which reportedly project to  
98 different regions of the thalamus (Herron and Dykes 1986; Kaas 1993). Additionally, Pacinian  
99 pathways may have more connections to BA1 than BA3b (Paul et al. 1972; Hyvärinen and  
100 Poranan 1978; Iwamura et al. 1993). Hence, the hierarchical order of somatosensory  
101 processing among Brodmann areas in S1 may be frequency-dependent or at least influenced  
102 by the supplied frequency of vibration. To investigate hierarchical differences caused by  
103 stimulated mechanoreceptor type, we supplied a vibrational stimulus to the fingertips at three  
104 different frequencies: 30 Hz, 110 Hz, and 190 Hz. A perfect isolation of stimulated  
105 mechanoreceptor type is not realistic and multiple pathways likely contribute to the observed  
106 cortical signal with increasing contributions of Pacinian pathways for higher stimulation  
107 frequencies (Choi et al. 2016; Kuroki et al. 2017). Thus, differences in initial cortical  
108 projection site between RA and Pacinian pathways could be detected through changes in pRF  
109 size for different vibrotactile stimulation frequencies.

110         In the present study, we scrutinize the hierarchical organization of S1 by measuring  
111 the properties of tactile pRFs in BA3b (from here on referred to as BA3), BA1, and BA2. The

112 five fingers of the right hand were vibrotactually stimulated at three different frequencies, 30  
113 Hz, 110 Hz, and 190 Hz, while Blood-Oxygen-Level-Dependent (BOLD) activity in S1 was  
114 measured with 7T fMRI. PRF modeling allows us to infer the somatotopic tuning of neuronal  
115 populations in each of the three Brodmann areas. We expect an increase in pRF size, the  
116 specificity of the somatotopic tuning, along the somatosensory processing pathway. Such a  
117 finding would indicate increasing spatial integration and be in accordance with sequential  
118 information processing and increasing processing complexity from BA3 to BA1, and finally  
119 BA2. The hierarchical order across Brodmann areas is further investigated by examining the  
120 temporal dynamics of the hemodynamic response function (HRF). Finally, the effect of  
121 mechanoreceptor pathway on cortical pRF size is presently unknown. Through pRF size  
122 estimations in different Brodmann areas under different vibrotactile frequency conditions, we  
123 investigate putative differences in cortical hierarchical projections related to different  
124 mechanoreceptor types.

## 125 **Material & Methods**

### 126 *Participants*

127 Eight healthy volunteers (age range 23-31 years old, 4 female) participated in the study. All  
128 participants gave written informed consent before entering the study. The protocol was  
129 approved by the local medical ethics committee of the University Medical Center Utrecht,  
130 Netherlands, in accordance with the Declaration of Helsinki (2013).

### 131 *Apparatus*

132 The vibrotactile stimulus was delivered using MR-compatible piezoelectric stimulators with a  
133 triangular shaped tip and a contact area of approximately 1 mm<sup>2</sup> (<http://dancerdesign.co.uk/>).  
134 The stimulation was controlled via a custom-written MATLAB ([www.mathworks.com](http://www.mathworks.com)) script.  
135 Analog stimulus signals were transferred to the stimulators using a NI-9264 digital-to-analog  
136 converter output module (National Instruments, Austin, TX, USA), which was connected to a  
137 conventional laptop and an amplifier.

138 We mounted 5 stimulators on a plexiglass plate using ordinary adhesive gum. The  
139 adhesive gum allowed for the repositioning of the 5 stimulators to match each participant's  
140 hand. The fingertips of the right hand were placed on the stimulators (digits did not touch  
141 each other). The hand and fingers were taped to the plexiglass plate with standard paper  
142 tape to prevent the fingers from accidentally disconnecting from the stimulators. The  
143 plexiglass plate rested on the participant's abdomen, while the right elbow was supported by  
144 towels. Using this setup, the subject could maintain a stationary position of the right  
145 arm/hand comfortably for the full length of the fMRI experiments. This minimized movement  
146 of the hands, which could affect the results. Moreover, subjects were explicitly instructed to  
147 keep both hands still during the experiments.

### 148 *Procedure and stimuli*

149 Each subject underwent 4 fMRI experiments: the first 3 were pRF experiments, conducted to  
150 estimate pRF properties (i.e. receptive field center, size, and amplitude). These 3  
151 experiments differed only with respect to the frequency of vibration (30 Hz, 110 Hz, and 190  
152 Hz). The 4<sup>th</sup> fMRI experiment was conducted to estimate the hemodynamic response  
153 function (HRF) within each individual subject's S1. During the 3 pRF experiments, each  
154 fingertip was stimulated 8 times in a pseudo-randomized order. Only one fingertip was  
155 stimulated at a time, and a single stimulation lasted for 4s. An intermittent stimulation  
156 paradigm was chosen to minimize adaptation processes and, therefore, maximize the  
157 observed BOLD response: during the 4s stimulation period, a 400ms on period was

158 alternated with a 100ms off period. After the 4s stimulation period, a 10s rest period ensued  
159 except for 8 randomly selected stimulation periods when the ensuing rest period was  
160 lengthened to 14.4s. Our analysis did not require a complete return to baseline, but rather  
161 allowed for the response to one stimulus to persist into the onset of the next. In total, a single  
162 pRF experiment took 595.2s. During the HRF experiment, a brief vibrotactile stimulation of  
163 500ms at 30 Hz was applied to all 5 fingertips simultaneously. The brief 500ms stimulation  
164 was delivered intermittently: 200ms on / 100ms off / 200ms on. There were 32 500ms events  
165 throughout the HRF experiment with variable inter-stimulus interval (ISI). The minimum ISI  
166 was 3.05s, the maximum ISI was 23.97s, and the median ISI was 7.98s. The full HRF  
167 experiment took 320s.

### 168 *Scan protocol*

169 Scanning was conducted at a 7 Tesla Philips Achieva scanner (Philips, Best, Netherlands),  
170 using a volume transmit and a 32-channel receive headcoil (Nova medical, MA, USA). A  
171 multi-slice gradient echo (GE) echo-planar imaging (EPI) sequence was used for functional  
172 image acquisition with the following specifications: TR/TE: 1600/27ms, flip angle: 70°,  
173 SENSE factor: 3 in the anterior-posterior direction, field-of view (FOV) (ap,fh,rl): 209.4 x 41.6  
174 x 165.0 mm at 1.6 x 1.6 x 1.6 mm voxel resolution, and interleaved slice acquisition. The  
175 FOV was placed on the superior part of the brain, covering the hand region of the postcentral  
176 gyrus. 372 volumes were acquired per pRF experiment and 200 volumes were acquired for  
177 the HRF experiment. Additionally, 10 volumes were acquired with a reversed phase  
178 encoding direction (i.e. posterior to anterior) for correction of geometrical distortions. Finally,  
179 a whole-brain T1-weighted volume was acquired with TR/TE: 7.00/3.05ms, flip angle: 8°,  
180 FOV (ap,fh,rl): 250 x 200 x 190 mm at 0.78 x 0.78 x 0.8 mm voxel size, and a whole-brain  
181 proton density volume of equal dimensions.

### 182 *Image processing*

183 The T1-weighted anatomical volume was adjusted for proton density to correct for large  
184 scale intensity inhomogeneities (Van de Moortele et al. 2009). Afterwards white matter and  
185 pial brain surfaces were estimated using Freesurfer (<https://surfer.nmr.mgh.harvard.edu/>).  
186 These surfaces were also inflated and flattened using Freesurfer. The functional volumes  
187 were slice time corrected, realigned (i.e. corrected for head motion), corrected for  
188 geometrical distortions, and co-registered to the anatomical T1-weighted volume using AFNI.  
189 Transformation matrices for these steps were computed using the AFNI functions 3dvolreg,  
190 3dQwarp, and 3dAllineate, respectively. The transformation matrices were combined and all  
191 spatial preprocessing transformations were applied within a single interpolation step using  
192 the AFNI function 3dNwarpApply to minimize smoothing caused by multiple interpolation

193 steps and general interpolation errors. The functional volumes were mapped onto the  
194 estimated cortical surface reconstructions across the full depth of the estimated grey matter  
195 using Freesurfer, creating a timeseries per surface vertex. The timeseries were high-pass  
196 filtered with a cut-off at 0.01 Hz and rescaled to percent signal change. Finally, regions of  
197 interest were drawn on the reconstructed cortical surface, based on the Brodmann area atlas  
198 supplied by Freesurfer (Fischl et al. 2008). Region BA3 corresponded with atlas areas BA3a  
199 and BA3b (covering the rostral wall of the postcentral gyrus). Region BA1 corresponded with  
200 atlas area BA1 (covering the crown of the postcentral gyrus). Finally, region BA2 (covering  
201 the caudal wall of the postcentral gyrus) was based on atlas area BA2, but manually limited  
202 posteriorly at the base of the postcentral sulcus.

### 203 *pRF analysis*

204 Each vertex' timeseries was fitted with a Gaussian receptive field model, which described the  
205 signal amplitude for any fingertip stimulation (1):

$$206 \quad g(x_i) = \exp\left(-\frac{(x_0-x_i)^2}{2\cdot\sigma^2}\right), x_i \in N, x_0 \in \{\mathbb{R}_{>0.5} | \mathbb{R}_{<5.5}\}, \sigma \in \{\mathbb{R}_{>0}\} \quad (1)$$

207 Where “ $x_i$ ” represents the stimulated fingertip and “ $N$ ” is the list of fingertips ranging from  
208 1=thumb to 5=little finger. The estimated pRF center, “ $x_0$ ”, describes the preferred fingertip  
209 per surface vertex and can be any real number (including fractioned numbers) between 0.5  
210 and 5.5. A surface vertex is taken to prefer: the thumb when,  $0.5 < x_0 < 1.5$ , index finger when,  
211  $1.5 < x_0 < 2.5$ , middle finger when,  $2.5 < x_0 < 3.5$ , ring finger when,  $3.5 < x_0 < 4.5$ , and the little  
212 finger when,  $4.5 < x_0 < 5.5$ . The estimated pRF size, “ $\sigma$ ”, is the spread of the Gaussian in units  
213 of fingers: the larger the pRF size, the more the neuronal population responds to stimulated  
214 fingertips in addition to the preferred one. The receptive field model “ $g(x_i)$ ”, then, is used to  
215 construct the effective task design (2):

$$216 \quad r(t) = \sum_{i \in N} s(x_i, t) \cdot g(x_i) \quad (2)$$

217 Where “ $r(t)$ ” is the effective task design, “ $s(x_i, t)$ ” is the onset design matrix, which is a 2D  
218 binary matrix representing for each fingertip “ $x_i$ ” the stimulation onset and duration in scans  
219 “ $t$ ”. The multiplication of the onset design matrix “ $s(x_i, t)$ ” and the Gaussian receptive field  
220 model “ $g(x_i)$ ” is summed over the fingertip dimension, resulting in the effective task design  
221 “ $r(t)$ ”. The effective task design is convolved with a hemodynamic response function (HRF),  
222 resulting in the predicted timeseries (3):

$$223 \quad p(t) = r(t) * h(t) \quad (3)$$



224 Where, “ $h(t)$ ” is the HRF. Instead of assuming a canonical HRF, we convolved the estimated  
225 HRFs from the HRF experiment (averaged across subjects, see below) with the effective  
226 task design “ $r(t)$ ”. Therefore, we used an HRF that was specific for each Brodmann area. The  
227 predicted timeseries model “ $p(t)$ ” was compared with the measured timeseries of each vertex  
228 (4):

$$229 \quad y(t) = \beta \cdot p(t) + c \quad (4)$$

230 Where  $y(t)$  is the measured vertex’ timeseries, “ $p(t)$ ” is the predicted timeseries, “ $\beta$ ” is a  
231 scalar representing the signal amplitude and “ $c$ ” is a constant. During the fitting procedure,  
232 optimal fits are calculated for the pRF center “ $x_0$ ” and size “ $\sigma$ ” from equation (1) and “ $\beta$ ” and  
233 “ $c$ ” from equation (4) using the Levenberg-Marquardt (Markwardt 2009) least-square  
234 minimization algorithm (Figure 1). Finally, goodness-of-fit F-statistics were calculated for  
235 each surface vertex model fit.

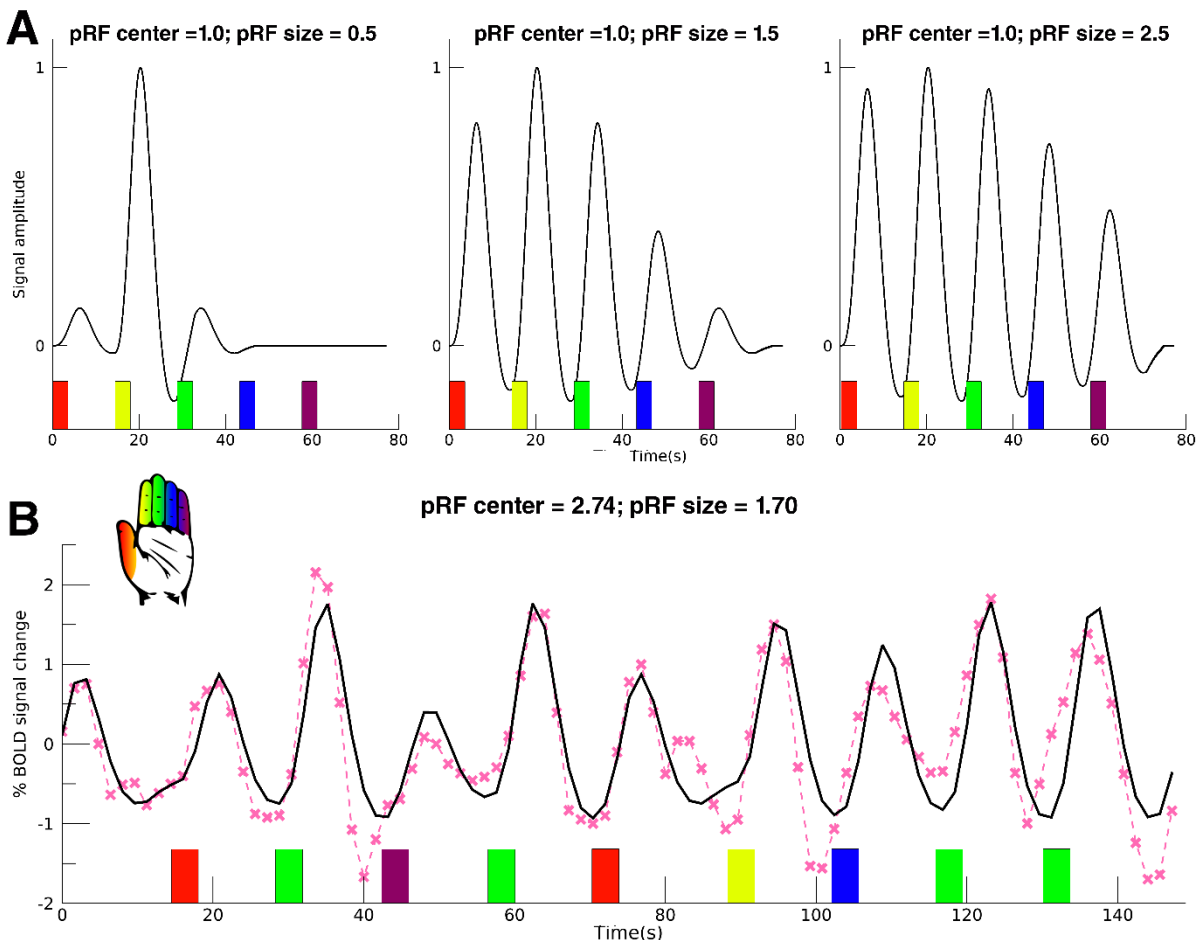

236

237 Figure 1

238 Title: pRF model timeseries

239 (A) Figure shows the effect of increasing pRF size on modeled timeseries. Left image shows model with pRF center = 1 (index  
240 finger, yellow bar), pRF size = 0.5 (finger units). Middle image: pRF center = 1, pRF size = 1.5. Right image: pRF center = 1,  
241 pRF size = 2.5. The model timeseries are convolved with the average HRF from the HRF experiment and the colored bars  
242 denote the model onset time for each of the fingertip conditions, see hand icon. (B) Fitted pRF timeseries (black) for one  
243 example vertex and the corresponding acquired fMRI timeseries (pink) are shown. For visibility, only a part of the complete  
244 timeseries is shown. The onsets of the fingertip stimulation conditions are represented by the colored bars, see also hand icon.  
245 This particular vertex was acquired from subject 4, BA1, 190 Hz, and was fitted with a model with pRF center= 2.74 (between  
246 index and middle finger) and pRF size = 1.70 finger units.

## 247 *HRF analysis*

248 For the HRF experiment, we estimated the hemodynamic response function of each vertex  
249 using a set of finite impulse response (FIR) functions (Lindquist et al. 2009). The timeseries  
250 were upsampled by a factor of 4 using a 3th degree B-spline interpolation, resulting in a time  
251 point every 400ms. This matched the stimulus onset resolution, as stimulus onsets were  
252 locked to time samples every 400ms. A set of finite impulses were constructed to cover the  
253 range of 14.4 seconds (i.e. 36 finite impulses), starting from the moment of stimulation. The  
254 amplitude in percent signal change at each time point was calculated using a multiple linear  
255 regression. An HRF per ROI was created by averaging the estimated HRFs of all vertices  
256 within the ROIs that showed a significant fit with respect to the HRF task design (false-  
257 discovery-rate corrected). Afterwards, the peak amplitude, time to peak (TTP) and full-width-  
258 at-half-maximum (FWHM) were extracted from the estimated HRF curves.

## 259 *Statistical analyses*

260 For the statistical analyses of all experiments we included the surface vertices with a  
261 significant goodness-of-fit F-statistic derived from the pRF experiments (false-discovery-rate  
262 corrected) that fell in one of the three predefined ROIs. The percentage explained variance  
263 per vertex was calculated through the Pearson correlation coefficient of predicted timeseries  
264 and obtained timeseries squared. The presence of a somatotopy was assessed using the  
265 vertex coordinates of the flattened surfaces. Initially, the flattened surfaces were manually  
266 rotated so that the central sulcus was vertically aligned along the dorsoventral axis. A  
267 somatotopy is defined here as the linear relationship between dorsoventral coordinates and  
268 pRF centers. Hence, the slope between coordinates and pRF centers reflects the presence  
269 of a somatotopy and was calculated using a linear regression per ROI, per vibrotactile  
270 frequency and per subject. We used Student's t-test to test if slopes deviated significantly  
271 from zero. We used a 2-way univariate repeated measures ANOVA with the slopes as  
272 dependent variable and ROI and vibrotactile frequency as repeated measures factors (3  
273 levels each) to test for differences in somatotopic structures per ROI or frequency of  
274 vibration. The pRF sizes were binned in 5 preferred finger representation bins, according to  
275 the pRF centers. Then, we applied a 3-way univariate repeated measures ANOVA to test for

276 differences in pRF size across ROI, vibrotactile frequency, and preferred finger  
277 representation (with 3, 3, and 5 levels, respectively) with linear contrasts for each factor. The  
278 same 3-way univariate repeated measures ANOVA was performed on the estimated  
279 amplitude of the percent BOLD signal change (i.e. " $\beta$ " from equation (4)). For the HRF  
280 experiment, differences in peak amplitude, TTP, and FWHM per ROI were also tested for  
281 using univariate repeated measures ANOVAs with only ROI as factor (3 levels).

282 **Results**

283 *S1 Somatotopy – spatial organization of pRFs*

284 We used a Gaussian receptive field model to estimate the timeseries of the pRF experiments  
285 (Figure 1B). The predicted timeseries explained on average 35% (s.d.=11%) of variance of  
286 the recorded BOLD fMRI signal within the 3 predefined ROIs. On the basis of the estimated  
287 pRF centers we found the somatotopy of the five fingertips along the ventrolateral to  
288 mediodorsal axis of the postcentral gyrus in all 3 Brodmann areas (Figure 2): BA3:  $t_{(7)}=13.10$ ,  
289  $p<0.001$ , BA1:  $t_{(7)}=13.25$ ,  $p<0.001$ , BA2:  $t_{(7)}=8.51$ ,  $p<0.001$ . The somatotopy, characterized  
290 as the slope of cortical coordinates and pRF centers, differed significantly across the 3  
291 Brodmann areas ( $F_{(2,14)}=15.26$ ,  $p<0.001$ ). Particularly, the somatotopy was less clear in  
292 Brodmann area BA2 (post-hoc somatotopy slope t-tests BA3-BA1:  $t_{(7)}=0.55$ ,  $p=0.589$ ; BA3-  
293 BA2:  $t_{(7)}=5.04$ ,  $p<0.001$ ; BA1-BA2:  $t_{(7)}=4.48$ ,  $p=0.001$ ). In BA2 there appears to be a cluster  
294 of pRF centers for the thumb and index finger and a second cluster for the middle, ring and  
295 little fingers (Figure 2B). The frequency of vibration, however, did not influence the  
296 somatotopy slope ( $F_{(2,14)}=0.25$ ,  $p=0.782$ ), although the projected somatotopy appeared less  
297 clear in several participants during the 30 Hz vibration condition compared to higher  
298 frequencies (Figure 3). We, finally, did not observe an interaction effect between Brodmann  
299 areas and applied frequency of vibration on the somatotopy slope ( $F_{(4,28)}=0.85$ ,  $p=0.505$ ),  
300 meaning that we did not find evidence for a somatotopy change in any Brodmann area for  
301 higher frequencies.

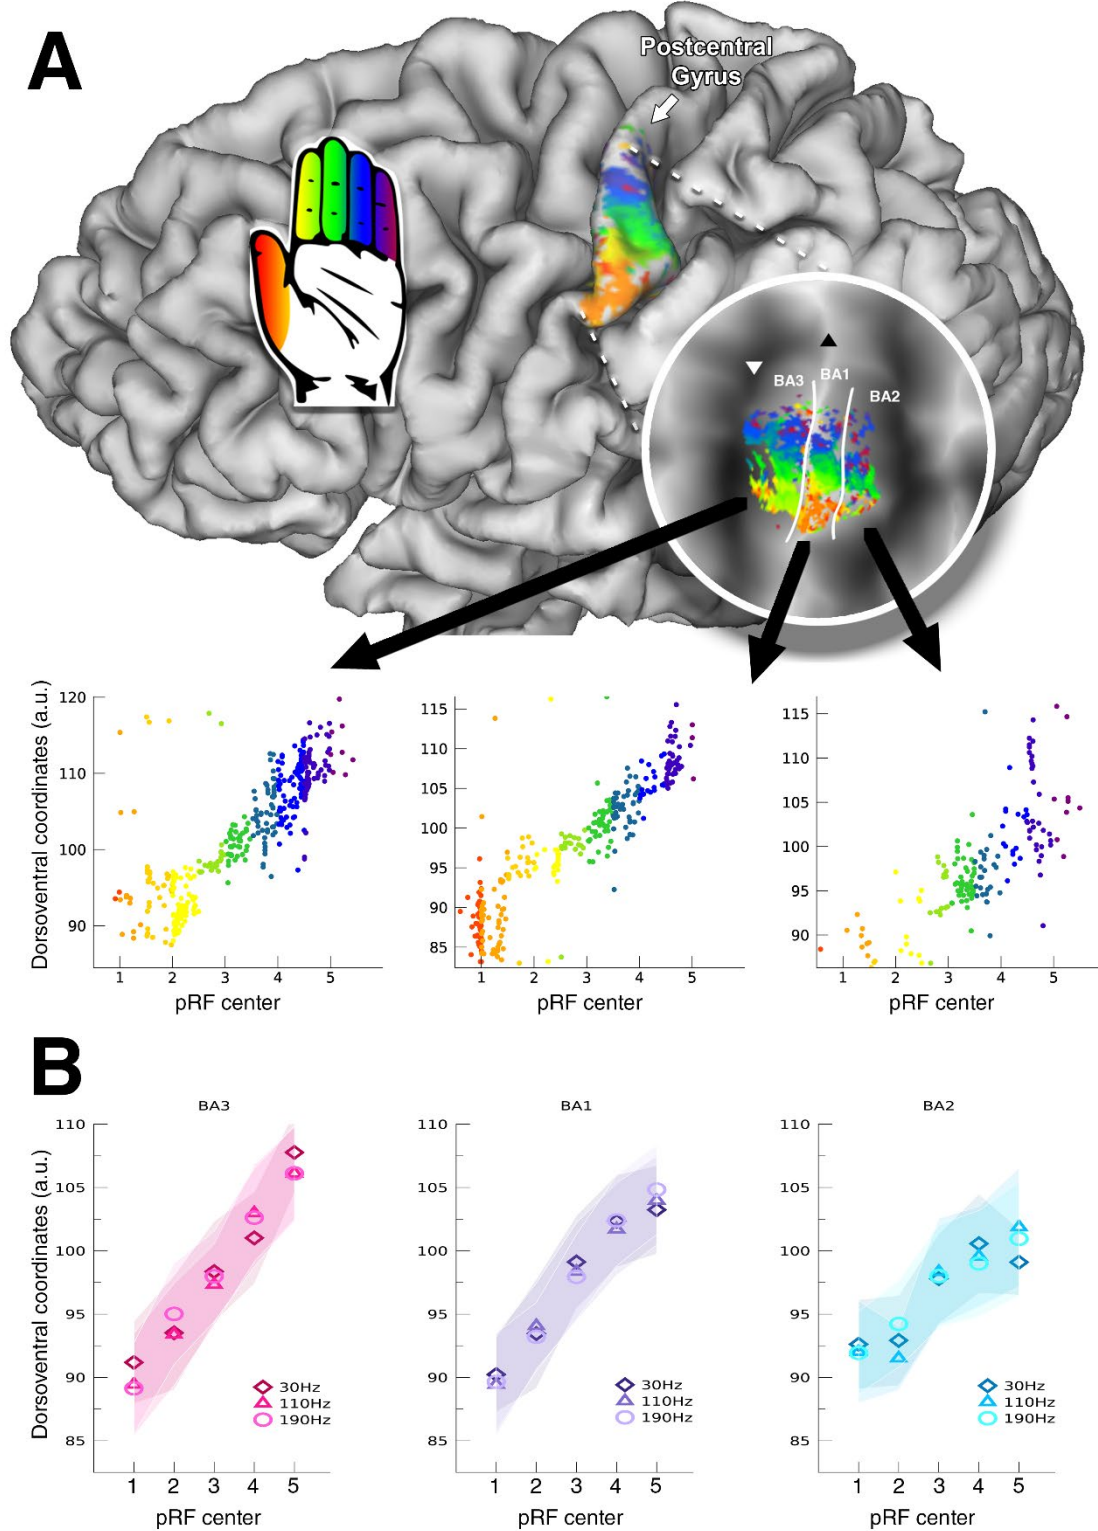

302

303 Figure 2

304 Title: Fingertip somatotopy

305 (A) Single subject pRF centers following 190 Hz vibrotactile stimulation are presented on a pial surface and flattened surface  
306 (circle). The cortical coordinates along the dorsoventral axis plotted against the pRF centers are shown for all three Brodmann  
307 areas. For the pRF centers, 1=thumb, 2=index finger, 3=middle finger, 4=ring finger, 5=little finger, which is also indicated by the  
308 colors in the scatterplot and the hand icon. (B) Group average of cortical coordinates along the dorsoventral axis plotted against

309 the mean pRF center per fingertip 1=thumb, 2=index finger, 3=middle finger, 4=ring finger, 5=little finger). Shaded area represents  
310 standard error of the mean across subjects. Different symbols represent different vibrational frequencies.

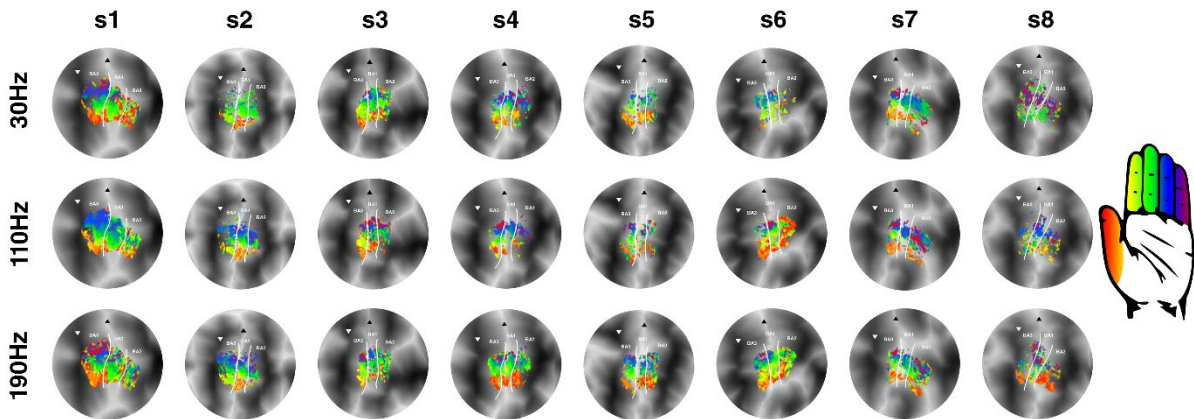

311

312 Figure 3

313 Title: pRF center maps

314 The pRF centers are displayed on flattened cortical surfaces for all subjects (s1-s8). Rows depict the different frequencies of  
315 vibrotactile stimulation (30 Hz, 110 Hz & 190 Hz). Borders between Brodmann areas are denoted by the white solid line. The  
316 base of the central sulcus is shown by the white downward triangle, and the crown of the postcentral gyrus is indicated by the  
317 black upward triangle. Correspondence of pRF center and fingertip is denoted by the hand icon.

### 318 *pRF sizes – fingertip specificity of the pRFs*

319 The estimated pRF sizes (Figure 4) differed significantly across Brodmann areas  
320 ( $F_{(2,14)}=13.26$ ,  $p<0.001$ ), showing a significant linear increase ( $t_{(14)}=4.90$ ,  $p<0.001$ ) from BA3  
321 to BA1 and finally BA2 (Figure 5A). The frequency of vibrotactile stimulation also influenced  
322 the receptive field sizes ( $F_{(2,14)}=6.03$ ,  $p=0.013$ , figure 5B), revealing a linear increase in  
323 receptive field size with an increasing vibrational frequency ( $t_{(14)}=3.24$ ,  $p=0.006$ ). However,  
324 there was no interaction effect of frequency of vibrotactile stimulation on the included  
325 Brodmann areas ( $F_{(4,28)}=0.69$ ,  $p=0.606$ ). Thus, we did not observe that receptive field sizes  
326 differed in any particular Brodmann area under differing vibrational frequency conditions.  
327 Lastly, pRF sizes also differed per preferred fingertip ( $F_{(4,28)}=6.90$ ,  $p<0.001$ ), which also  
328 exhibited a significant linear relationship between fingertip representation and pRF size  
329 ( $t_{(28)}=5.13$ ,  $p<0.001$ ). Thus, pRF sizes were observed to be smallest for thumb  
330 representations and gradually increased for cortical representations of the remaining 4  
331 fingertips, with the largest receptive field sizes for the little fingertip representations (Figure  
332 5C). This effect of fingertip representation on pRF size did not differ among Brodmann areas  
333 ( $F_{(8,56)}=1.32$ ,  $p=0.253$ ), or during the different frequencies of vibrotactile stimulation conditions  
334 ( $F_{(8,56)}=1.40$ ,  $p=0.217$ ).

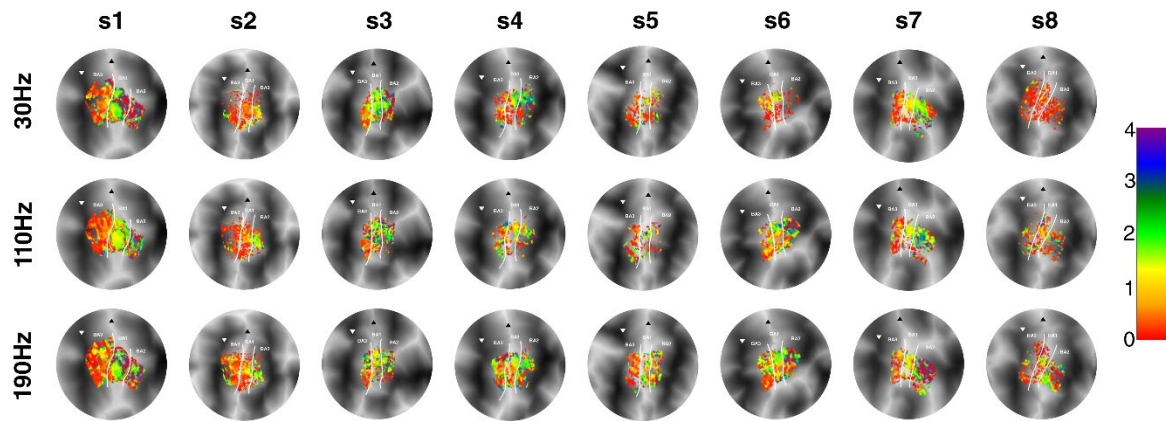

335

336 Figure 4

337 Title: pRF size maps

338 The pRF sizes are displayed on flattened cortical surfaces for all subjects (s1-s8). Rows depict the different frequencies of  
339 vibrotactile stimulation (30 Hz, 110 Hz & 190 Hz). Borders between Brodmann areas are denoted by the white solid line. The  
340 base of the central sulcus is shown by the white downward triangle, and the crown of the postcentral gyrus is indicated by the  
341 black upward triangle.

#### 342 *Amplitude of the BOLD signal*

343 We found that the amplitude of the estimated percentage of BOLD signal change (“ $\beta$ ”)  
344 differed significantly across the 3 Brodmann areas ( $F_{(2,14)}=8.15$ ,  $p=0.004$ ), where largest  
345 percent signal changes were measured in BA3 and gradually decreased towards BA2 ( $t_{(14)}=-$   
346  $4.03$ ,  $p=0.001$ , figure 5D). However, both preferred fingertip and vibrotactile frequency did not  
347 have a significant effect on the BOLD signal amplitudes ( $F_{(4,28)}=2.21$ ,  $p=0.094$ , and  
348  $F_{(2,14)}=1.75$ ,  $p=0.208$ , respectively, Figure 5E-F). Thus, the percent BOLD signal change  
349 differed per Brodmann area, but was not significantly affected by the preferred fingertip of  
350 included populations, or by the vibrotactile frequency at which fingertips were stimulated.

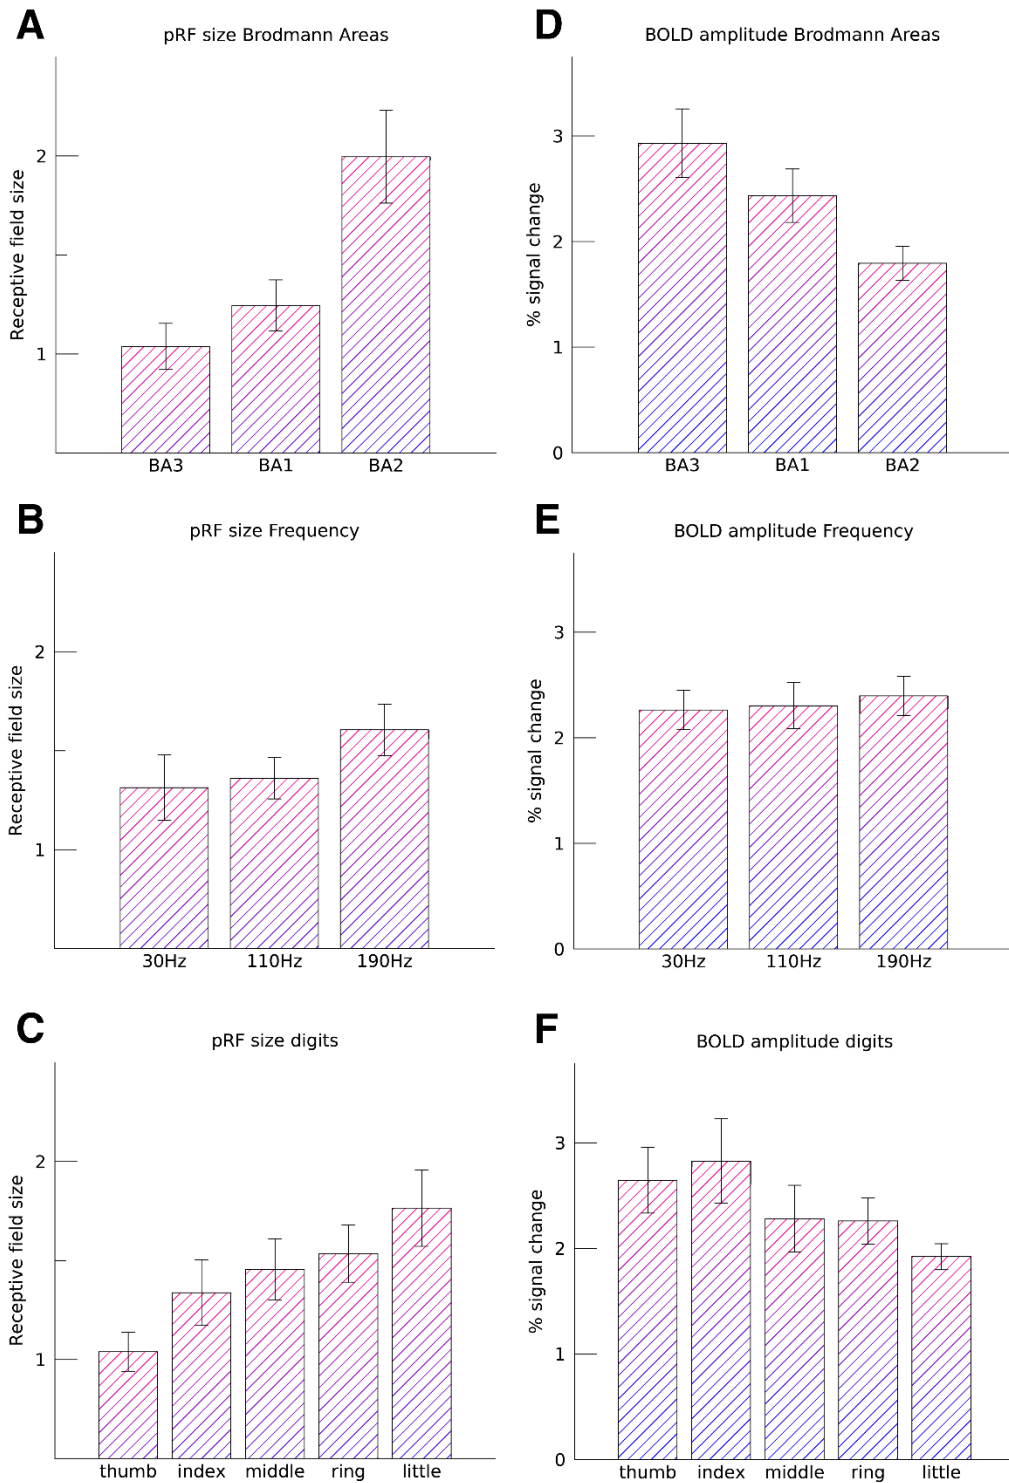

351

352 Figure 5

353 Title: pRF sizes and BOLD amplitudes

354 Figure shows the mean pRF size across subjects for Brodmann areas (A), fingertip representation (B), and vibrotactile  
355 frequency (C), as well as the corresponding estimated BOLD signal amplitude (D-F). Error bars denote the standard error of the  
356 mean across subjects.



357 *Hemodynamic response function*

358 We estimated the hemodynamic response function within S1 (figure 6). Although the largest  
359 percent signal change was observed for BA1, the peak amplitude did not deviate significantly  
360 across Brodmann areas ( $F_{(2,12)}=2.68$ ,  $p=0.109$ ). Neither did the FWHM of the HRFs differ  
361 significantly between BA3, BA1, & BA2 ( $F_{(2,12)}=0.97$ ,  $p=0.407$ ). However, the TTP differed  
362 significantly per Brodmann area ( $F_{(2,12)}=5.42$ ,  $p=0.021$ ), where the TTP in BA3 was on  
363 average 0.51s (s.e.=0.17s) faster compared to the TTP seen in the other 2 Brodmann areas  
364 (post-hoc t-test BA3 – BA1+BA2:  $t_{(12)}=3.07$ ,  $p=0.010$ ).

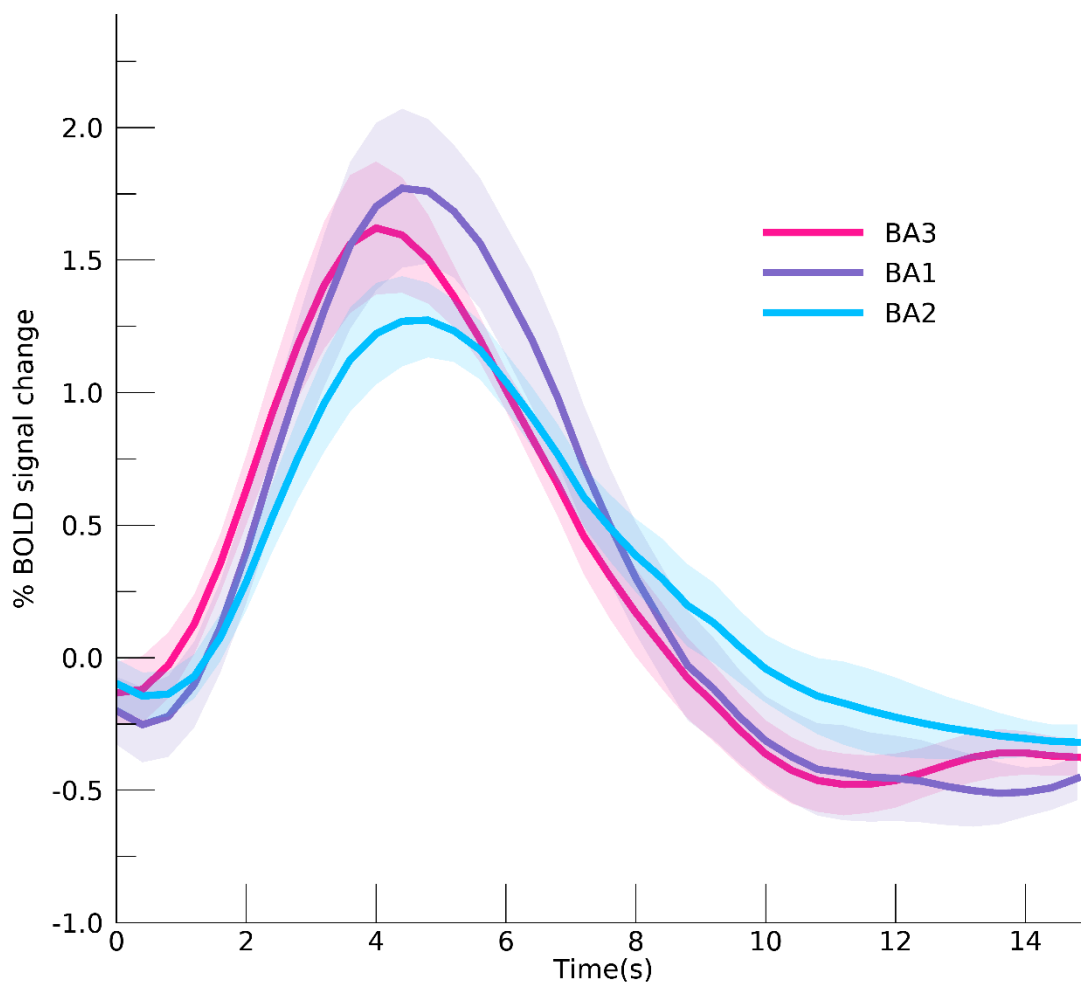

365

366 Figure 6

367 Title: Hemodynamic response functions

368 Estimated hemodynamic response functions per Brodmann area. The areas denote one standard error of the mean across  
369 subjects.

370

## 371 **Discussion**

### 372 *General discussion*

373 In the current study we estimated pRFs in 3 subdivisions of human S1. The patterns of pRFs  
374 can be used to suggest a cortical hierarchy among these areas, if we operationalize the  
375 notion of hierarchy by the size of receptive field, specifically assuming that an area with  
376 smaller pRFs is earlier in the hierarchy. We fitted a pRF model to fMRI BOLD activity in S1,  
377 following vibrotactile stimulation of the fingertips. Additionally, we stimulated at 3 different  
378 frequencies of vibration to investigate changes in pRF size across S1 related to  
379 mechanoreceptor type and corresponding afferents. We found that pRF sizes increased from  
380 BA3 to BA1 and finally BA2, consistent with the notion of a cortical hierarchy in which spatial  
381 somatic information is pooled into larger and larger regions. This effect was observed under  
382 all vibrotactile frequency conditions. PRF sizes also increased with higher frequency of  
383 stimulation. These latter two results suggests that RA and Pacinian channels share a similar  
384 cortical hierarchy, but that somatic information from a relatively larger area of the hand is  
385 pooled in S1 neuronal populations during stimulation at higher frequencies. During all  
386 frequencies of vibrotactile stimulation we observed a somatotopy of fingertips, despite the  
387 somatotopy being less clear in BA2 compared to BA3 and BA1. No significant effect of  
388 frequency on somatotopy was observed, indicating that the whole of S1 responds to  
389 vibrotactile fingertip stimulation regardless of stimulation frequency. Finally, we found that  
390 pRF sizes gradually increased from thumb to little finger. Neuronal populations that  
391 preferentially code for the thumb responded least to stimulation of other digits, compared to  
392 neuronal populations coding for the little finger, which responded to stimulation of most other  
393 digits.

### 394 *Cortical hierarchy S1*

395 Cortical hierarchy was defined in this study through information integration, which increases  
396 when information progresses higher up the processing hierarchy. Information integration is  
397 associated with the widening of response profiles of neuronal populations with respect to  
398 information coming from any number of possible sources. We estimated the widening of the  
399 response profiles of neuronal populations with a Gaussian shaped population receptive field  
400 model, where the spatial integration of somatosensory information is represented by the pRF  
401 size. We find that pRF sizes differ substantially between Brodmann areas, BA3, BA1, and  
402 BA2. Neuronal populations in BA3 have on average smallest pRF sizes, and the pRF sizes  
403 increase along the cortical processing hierarchy towards BA1 and are largest in BA2. PRF  
404 sizes in BA2 are approximately twice the size as the pRF sizes measured in BA3. This result  
405 is likely analogous to the pRF size increase among cortical areas in visual cortex, where the

406 primary visual cortex (V1) predominantly receives thalamic output and exhibits smaller  
407 receptive field sizes than visual cortical areas further up the hierarchy, as measured both at  
408 the single unit level (Felleman and Van Essen 1991) and the population level with fMRI  
409 (Dumoulin and Wandell 2008; Wandell and Winawer 2015), which likely reflects the average  
410 receptive field size of the underlying ensemble of neurons.

411 The hierarchical order of BA3, BA1 and BA2 is further supported by a shorter time-to-  
412 peak of the estimated HRF in BA3 compared to BA1 and BA2, which has also been  
413 observed in magnetoencephalography (MEG) studies (Inui et al. 2004; Suzuki et al. 2013).  
414 Thus, the order of cortical processing becomes apparent not merely through information  
415 integration, but also in the temporal domain. However, it is important to note that both  
416 feedforward and feedback neuronal processes contribute to the observed HRFs. Therefore,  
417 differences in temporal components of the HRF cannot solely be attributed to differences in  
418 sequential processing order. It is, for instance, possible that populations in BA1 and BA2 are  
419 not merely involved in somatosensory processing at a later point in time, but also for a  
420 slightly longer period of time, which would influence the observed HRF. Additionally, HRF  
421 latency can be affected by non-neural processes, such as the presence of draining veins  
422 (Lee et al. 1995). Nevertheless, the time-to-peak of the observed HRF in BA3 is roughly 0.5  
423 seconds faster compared to the time-to-peak of the HRF in BA1 and BA2. Assuming factors  
424 such as draining veins don't vary systematically between subareas in S1, this difference  
425 likely has a neuronal contribution. Our findings extend animal findings to humans, and are  
426 consistent with a cortical hierarchy in human S1, in which BA3 is the first cortical area to  
427 receive tactile information, which is then forwarded to BA1 and BA2.

#### 428 *Mechanoreceptive afferents*

429 We applied three frequencies of vibrotactile stimulation to the fingertips to investigate the  
430 cortical hierarchy in human S1 as a result of different cutaneous mechanoreceptor afferents.  
431 The 30 Hz flutter frequency most likely activated Meissner corpuscles, whereas the higher  
432 frequencies would have resulted in increased contributions of Pacinian corpuscles  
433 (Bolanowski et al. 1988; Johnson 2001). Regardless of the stimulated mechanoreceptor, we  
434 observed somatotopic structures in all three included Brodmann areas. However, the  
435 somatotopy in BA2 was less clear than in the other two areas, which likely reflects less clear  
436 distinctions between cortical finger representations for areas higher up the cortical hierarchy,  
437 which has been reported in a previous animal study (Iwamura et al. 1983, 1993; Pons et al.  
438 1985). We did not observe that the frequency of vibrotactile stimulation influenced the  
439 somatotopic structures of Brodmann areas, which may be in agreement with the notion of S1  
440 neurons responding to multiple mechanoreceptor modalities (Pei et al. 2009; Abraira and

441 Ginty 2013; Saal and Bensmaia 2014). However, previous optical imaging studies in  
442 monkeys have observed distinct columnar structures related to different types of  
443 mechanoreceptors in BA3. (Chen et al. 2001; Friedman et al. 2004). These frequency-  
444 dependent cortical columns are reportedly smaller than 400 $\mu$ m in size. The spatial resolution  
445 used in this study was not sufficiently high to capture these differences in cortical projection  
446 for different mechanoreceptor afferents.

447 Our results show that pRF sizes increase with increasing frequency of vibrotactile  
448 stimulation. This effect was not found to differ across the three Brodmann areas and,  
449 therefore, we find no evidence to support the notion that different mechanoreceptors types  
450 project to S1 in different ways. The increase in pRF size for increased frequency could have  
451 been caused by several different processes. First, cutaneous mechanoreceptive units have  
452 receptive fields themselves, which could shape the feedforward information stream to S1.  
453 Mechanoreceptors in glabrous skin such as the Meissner corpuscle have relatively small  
454 receptive fields, whereas Pacinian corpuscles reportedly have receptive fields that extend  
455 beyond the range of one finger (Bell et al. 1994; Bolanowski and Pawson 2003). Second,  
456 neuronal activation thresholds could be dependent on vibrotactile frequency (Nelson et al.  
457 2004; Simons et al. 2005; Ryun et al. 2017). Suprathreshold levels of activity for S1 neuronal  
458 populations could be attained during stimulation of cutaneous mechanoreceptors at high  
459 frequencies that would fall outside the neuronal populations' receptive fields during  
460 stimulation at lower frequencies. Third, the increase in the observed pRF size for higher  
461 frequencies of vibrotactile stimulation might be an extra-classical receptive field effect  
462 (Friston 2005; Schwabe et al. 2006). It has been suggested that vibrotactile frequency  
463 discrimination is not solely driven by mechanoreceptive afferents (Kuroki et al. 2017;  
464 Birznieks et al. 2019). There may be an additional system for vibrotactile frequency  
465 processing, possibly involving horizontal connections (Schwark and Jones 1989) or the  
466 secondary somatosensory cortex (Nelson et al. 2004; Chung et al. 2013; Kalberlah et al.  
467 2013). Further research is needed to fully characterize S1 pRF properties as a function of  
468 frequency of vibrotactile stimulation.

469 In contrast to pRF size, we did not find that the amplitude of the BOLD signal was  
470 significantly affected by frequency of vibrotactile stimulation despite the substantial difference  
471 in kinetic energy delivered to cutaneous mechanoreceptors. Previous studies, however,  
472 reported that the BOLD amplitude can either increase (Nelson et al. 2004; Goloshevsky et al.  
473 2008) or decrease (Chung et al. 2013) for increasing vibrotactile frequencies of stimulation.  
474 Especially when applying a vibrotactile stimulus for extended time periods, adaption  
475 processes might have a negative effect on the BOLD signal amplitude. For the current  
476 experiments we used an intermittent stimulation paradigm to minimize putative adaptation to

477 the vibrotactile stimulus. It is possible that the current stimulation duration in combination with  
478 the intermittent stimulation paradigm equalized effects of different vibrotactile frequencies on  
479 BOLD amplitude.

#### 480 *Fingertip pRF size*

481 We find that fingertip representations differ in pRF size. On average, cortical representations  
482 of the thumb exhibited the smallest pRF sizes, as we have reported previously (Schellekens  
483 et al. 2018). A gradual increase in pRF size is observed when progressing along the  
484 somatotopy, i.e. pRF size thumb < index < middle < ring < little finger. In a recent study,  
485 Puckett et al. 2020 reported larger pRF sizes in S1 for little finger representations compared  
486 to the index, middle and ring finger following a tactile stimulus, while measurements of the  
487 thumb were not included in their study. However, they did not observe a gradual change in  
488 pRF size across finger representations. The difference in results could possibly have been  
489 caused by methodological differences such as the smoothing applied in their analysis, which  
490 will generally increase pRF size estimates and increase the resemblance of pRF properties  
491 across voxels due to the Gaussian weighted average of neighboring voxels' timeseries in  
492 Gaussian smoothing algorithms. Additionally, the usage of a separately estimated HRF in our  
493 study plausibly leads to better pRF estimations than using a canonical HRF as was done in  
494 the study of Puckett et al. 2020.

495         The difference in pRF size across fingertips occurred in all included Brodmann areas  
496 and under all vibrotactile frequency conditions. This makes it unlikely that the effect of  
497 fingertip representation on pRF size reflects functional hierarchical processes. Rather, the  
498 pRF size reflects the amount of integration of mechanoreceptive afferents from all fingers  
499 within single neuronal populations. Thus, the differences in pRF size per fingertip  
500 representation may be analogous to the increase in pRF size found in visual cortex for  
501 eccentricity representations, where foveal representations display smallest pRF sizes and  
502 outer eccentricities display larger pRF sizes (Smith et al. 2001; Dumoulin and Wandell 2008;  
503 Harvey and Dumoulin 2011). Assuming that neuronal populations representing the fovea  
504 might require high specificity for visual stimulus processing, a similar requirement may apply  
505 to somatosensory processing of tactile stimulation from the thumb and index finger. The  
506 thumb and index finger have the highest degree of motor acuity (Lachnit and Pieper 1990)  
507 and spatial acuity for somatosensory discrimination (Vega-Bermudez and Johnson 2001).  
508 Cortical pRF size might, additionally, relate to lower detection thresholds for thumb and index  
509 finger compared to the other digits in tactile discrimination tasks (Tamè et al. 2014). Our  
510 results indicate that neuronal populations that respond preferentially to the thumb and index

511 finger receive relatively less mechanoreceptive input from the other fingers, compared to the  
512 cortical middle, ring and little finger representations, respectively.

### 513 *Conclusions*

514 We applied pRF modeling to investigate hierarchical information processing in S1 following  
515 vibrotactile stimulation of the five fingertips. PRF modeling allows for the assessment of a  
516 fingertip somatotopy in Brodmann areas BA3, BA1, and BA2. The pRF size portrays the  
517 degree of spatial information integration from the five fingertips within neuronal populations of  
518 cyto-architecturally distinct areas; smaller pRFs are associated with less spatial integration  
519 and earlier stages of the cortical processing hierarchy. pRF sizes were smallest in BA3,  
520 slightly increased for BA1, and approximately doubled in BA2, consistently across three  
521 different vibration frequencies. Additionally, we observed a difference in the time course of  
522 the hemodynamic response function among these Brodmann areas, with the shortest time-  
523 to-peak in BA3. Our findings confirm that the cortical hierarchy of the separate Brodmann  
524 areas in human S1 resembles the processing order observed in animal studies progressing  
525 from BA3 to BA1 and finally BA2, independent of the activated mechanoreceptors.

526

527 **Declarations**

528 *Funding*

529 This work was supported by the National Institute Of Mental Health of the  
530 National Institutes of Health under Award Number R01MH111417

531 *Conflicts of interest*

532 There are no conflicts of interest.

533 *Ethics approval*

534 This study was approved by the local medical ethics committee.

535 *Consent to participate*

536 All participants gave written informed consent prior to inclusion.

537 *Availability of data, material and code*

538 All data can be made available.

539 *Authors' contribution*

540 Conceptualization: WS, MT, SB, JW, NR, NP

541 Data acquisition: WS, MT

542 Analysis: WS, MT

543 Writing: WS

544 **References**

- 545 Abraira VE, Ginty DD (2013) The sensory neurons of touch. *Neuron* 79:618–639.  
546 <https://doi.org/10.1016/j.neuron.2013.07.051>
- 547 Akselrod M, Martuzzi R, Serino A, et al (2017) Anatomical and functional properties of the  
548 foot and leg representation in areas 3b, 1 and 2 of primary somatosensory cortex in  
549 humans: A 7T fMRI study. *Neuroimage* 159:473–487.  
550 <https://doi.org/10.1016/j.neuroimage.2017.06.021>
- 551 Ann Stringer E, Qiao PG, Friedman RM, et al (2014) Distinct fine-scale fMRI activation  
552 patterns of contra- and ipsilateral somatosensory areas 3b and 1 in humans. *Hum Brain*  
553 *Mapp* 35:4841–4857. <https://doi.org/10.1002/hbm.22517>
- 554 Armstrong-James M (1975) The functional status and columnar organization of single cells  
555 responding to cutaneous stimulation in neonatal rat somatosensory cortex S1. *J Physiol*  
556 246:501–538
- 557 Bell J, Bolanowski S, Holmes MH (1994) The structure and function of pacinian corpuscles:  
558 A review. *Prog Neurobiol* 42:79–128. [https://doi.org/10.1016/0301-0082\(94\)90022-1](https://doi.org/10.1016/0301-0082(94)90022-1)
- 559 Birznieks I, McIntyre S, Nilsson HM, et al (2019) Tactile sensory channels over-ruled by  
560 frequency decoding system that utilizes spike pattern regardless of receptor type. *Elife*  
561 8:1–13. <https://doi.org/10.7554/eLife.46510>
- 562 Blankenburg F, Ruben J, Meyer R, et al (2003) Evidence for a rostral-to-caudal somatotopic  
563 organization in human primary somatosensory cortex with mirror-reversal in areas 3b  
564 and 1. *Cereb Cortex* 13:987–993. <https://doi.org/10.1093/cercor/13.9.987>
- 565 Bodegård A, Geyer S, Grefkes C, et al (2001) Hierarchical processing of tactile shape in the  
566 human brain. *Neuron* 31:317–328. [https://doi.org/10.1016/S0896-6273\(01\)00362-2](https://doi.org/10.1016/S0896-6273(01)00362-2)
- 567 Bolanowski SJ, Pawson L (2003) Organization of Meissner corpuscles in the glabrous skin of  
568 monkey and cat. *Somatosens Mot Res* 20:223–231.  
569 <https://doi.org/10.1080/08990220310001622915>
- 570 Bolanowski SJJ, Gescheider GA, Verrillo RT, Checkosky CM (1988) Four channels mediate  
571 the mechanical aspects of touch. *J Acoust Soc Am* 84:1680–1694
- 572 Chen LM, Friedman RM, Ramsden BM, et al (2001) Fine-scale organization of SI (area 3b)  
573 in the squirrel monkey revealed with intrinsic optical imaging. *J Neurophysiol* 86:3011–  
574 3029. <https://doi.org/10.1152/jn.2001.86.6.3011>



- 575 Choi MH, Kim SP, Kim HS, Chung SC (2016) Inter-and Intradigit Somatotopic Map of High-  
576 Frequency Vibration Stimulations in Human Primary Somatosensory Cortex. *Med*  
577 (United States) 95:1–9. <https://doi.org/10.1097/MD.00000000000003714>
- 578 Chung JM, Surmeier DJ, Lee KH, et al (1986) Classification of primate spinothalamic and  
579 somatosensory thalamic neurons based on cluster analysis. *J Neurophysiol* 56:308–  
580 327. <https://doi.org/10.1152/jn.1986.56.2.308>
- 581 Chung YG, Kim J, Han S woo, et al (2013) Frequency-dependent patterns of somatosensory  
582 cortical responses to vibrotactile stimulation in humans : A fMRI study. *Brain Res*  
583 1504:47–57. <https://doi.org/10.1016/j.brainres.2013.02.003>
- 584 Da Rocha Amaral S, Sanchez Panchuelo RM, Francis S (2019) A Data-Driven Multi-scale  
585 Technique for fMRI Mapping of the Human Somatosensory Cortex. *Brain Topogr.*  
586 <https://doi.org/10.1007/s10548-019-00728-6>
- 587 DiCarlo JJ, Johnson KO, Hsiao SS (1998) Structure of receptive fields in area 3b of primary  
588 somatosensory cortex in the alert monkey. *J Neurosci* 18:2626–45
- 589 Dijkerman HC, de Haan EHF (2007) Somatosensory processes subserving perception and  
590 action. *Behav Brain Sci* 30:189–201. <https://doi.org/10.1017/S0140525X07001392>
- 591 Duffy FH, Burchfiel JL (1971) Somatosensory System: Organizational Hierarchy from Single  
592 Units in Monkey Area 5. *Am Assoc Adv Sci* 172:273–275
- 593 Dumoulin SO, Hess RF, May KA, et al (2014) Contour extracting networks in early  
594 extrastriate cortex. *J Vis* 14(5):1–14. <https://doi.org/10.1167/14.5.18>.doi
- 595 Dumoulin SO, Wandell BA (2008) Population receptive field estimates in human visual  
596 cortex. *Neuroimage* 39:647–60. <https://doi.org/10.1016/j.neuroimage.2007.09.034>
- 597 Felleman DJ, Van Essen DC (1991) Distributed hierarchical processing in the primate  
598 cerebral cortex. *Cereb Cortex* 1:1–47. <https://doi.org/10.1093/cercor/1.1.1>
- 599 Fischl B, Rajendran N, Busa E, et al (2008) Cortical folding patterns and predicting  
600 cytoarchitecture. *Cereb Cortex* 18:1973–1980. <https://doi.org/10.1093/cercor/bhm225>
- 601 Friedman DP (1983) Laminar patterns of termination of cortico-cortical afferents in the  
602 somatosensory system. *Brain Res.* [https://doi.org/10.1016/0006-8993\(83\)91103-4](https://doi.org/10.1016/0006-8993(83)91103-4)
- 603 Friedman RM, Chen LM, Roe AW (2004) Modality maps within primate somatosensory  
604 cortex. *Proc Natl Acad Sci U S A* 101:12724–12729.

- 605 <https://doi.org/10.1073/pnas.0404884101>
- 606 Friston K (2005) A theory of cortical responses. *Philos Trans R Soc B Biol Sci* 360:815–836.  
607 <https://doi.org/10.1098/rstb.2005.1622>
- 608 Gescheider GA, Bolanowski SJ, Verrillo RT (2004) Some characteristics of tactile channels.  
609 *Behav Brain Res* 148:35–40. [https://doi.org/10.1016/S0166-4328\(03\)00177-3](https://doi.org/10.1016/S0166-4328(03)00177-3)
- 610 Goloshevsky AG, Silva AC, Dodd SJ, Koretsky AP (2008) BOLD fMRI and Somatosensory  
611 Evoked Potentials Are Well Correlated Over a Broad Range of Frequency Content of  
612 Somatosensory Stimulation of the Rat Forepaw. *Brain Res* 1195:67–76.  
613 <https://doi.org/10.1038/jid.2014.371>
- 614 Haak K V., Cornelissen FW, Morland AB (2012) Population receptive field dynamics in  
615 human visual cortex. *PLoS One* 7:1–8. <https://doi.org/10.1371/journal.pone.0037686>
- 616 Harvey BM, Dumoulin SO (2011) The relationship between cortical magnification factor and  
617 population receptive field size in human visual cortex: constancies in cortical  
618 architecture. *J Neurosci* 31:13604–12. [https://doi.org/10.1523/JNEUROSCI.2572-](https://doi.org/10.1523/JNEUROSCI.2572-11.2011)  
619 [11.2011](https://doi.org/10.1523/JNEUROSCI.2572-11.2011)
- 620 Harvey MA, Saal HP, Dammann JF, Bensmaia SJ (2013) Multiplexing Stimulus Information  
621 through Rate and Temporal Codes in Primate Somatosensory Cortex. *PLoS Biol* 11:.  
622 <https://doi.org/10.1371/journal.pbio.1001558>
- 623 Herron P, Dykes R (1986) The ventroposterior inferior nucleus in the thalamus of cats: A  
624 relay nucleus in the Pacinian pathway to somatosensory cortex. *J Neurophysiol*  
625 56:1475–1497. <https://doi.org/10.1152/jn.1986.56.6.1475>
- 626 Hlustík P, Solodkin a, Gullapalli RP, et al (2001) Somatotopy in human primary motor and  
627 somatosensory hand representations revisited. *Cereb Cortex* 11:312–321.  
628 <https://doi.org/10.1093/cercor/11.4.312>
- 629 Hubel DH, Wiesel TN (1968) Receptive fields and functional architecture of monkey striate  
630 cortex. *J Physiol* 195:215–243
- 631 Hyvärinen J, Poranan A (1978) Receptive field integration and submodality convergence in  
632 the hand area of the post-central gyrus of the alert monkey. *J Physiol* 283:539–556
- 633 Inui K, Wang X, Tamura Y, et al (2004) Serial processing in the human somatosensory  
634 system. *Cereb Cortex* 14:851–857. <https://doi.org/10.1093/cercor/bhh043>

- 635 Iwamura Y (1998) Hierarchical somatosensory processing. *Curr Opin Neurobiol* 8:522–528.  
636 [https://doi.org/10.1016/S0959-4388\(98\)80041-X](https://doi.org/10.1016/S0959-4388(98)80041-X)
- 637 Iwamura Y, Tanaka M, Sakamoto M, Hikosaka O (1983) Functional subdivisions  
638 representing different finger regions in area 3 of the first somatosensory cortex of the  
639 conscious monkey. *Exp Brain Res* 51:315–326
- 640 Iwamura Y, Tanaka M, Sakamoto M, Hikosaka O (1993) Rostrocaudal gradients in the  
641 neuronal receptive field complexity in the finger region of the alert monkey's postcentral  
642 gyrus. *Exp Brain Res* 92:360–368. <https://doi.org/10.1007/BF00229023>
- 643 Johnson KO (2001) The roles and functions of cutaneous mechanoreceptors. *Curr Opin*  
644 *Neurobiol* 11:455–461. [https://doi.org/10.1016/S0959-4388\(00\)00234-8](https://doi.org/10.1016/S0959-4388(00)00234-8)
- 645 Jones EG, Powell TPS (1970) Connexions of the somatic sensory cortex of the rhesus  
646 monkey: III.-Thalamic connexions. *Brain* 93:37–56. <https://doi.org/10.1093/brain/93.1.37>
- 647 Kaas JH (1993) The functional organization of somatosensory cortex in primates. *Ann Anat*  
648 175:509–518. [https://doi.org/10.1016/S0940-9602\(11\)80212-8](https://doi.org/10.1016/S0940-9602(11)80212-8)
- 649 Kalberlah C, Villringer A, Pleger B (2013) Dynamic causal modeling suggests serial  
650 processing of tactile vibratory stimuli in the human somatosensory cortex-An fMRI  
651 study. *Neuroimage* 74:164–171. <https://doi.org/10.1016/j.neuroimage.2013.02.018>
- 652 Kikkert S, Kolasinski J, Jbabdi S, et al (2016) Revealing the neural fingerprints of a missing  
653 hand. *Elife* 5:1–19. <https://doi.org/10.7554/eLife.15292>
- 654 Kim J, Müller KR, Chung YG, et al (2015) Distributed functions of detection and  
655 discrimination of vibrotactile stimuli in the hierarchical human somatosensory system.  
656 *Front Hum Neurosci* 8:1–10. <https://doi.org/10.3389/fnhum.2014.01070>
- 657 Klein BP, Harvey BM, Dumoulin SO (2014) Attraction of Position Preference by Spatial  
658 Attention throughout Human Visual Cortex. *Neuron* 84:227–237.  
659 <https://doi.org/10.1016/j.neuron.2014.08.047>
- 660 Kolasinski J, Makin TR, Jbabdi S, et al (2016) Investigating the Stability of Fine-Grain Digit  
661 Somatotopy in Individual Human Participants. *J Neurosci* 36:1113–1127.  
662 <https://doi.org/10.1523/JNEUROSCI.1742-15.2016>
- 663 Kuroki S, Watanabe J, Nishida S (2017) Integration of vibrotactile frequency information  
664 beyond the mechanoreceptor channel and somatotopy. *Sci Rep* 7:1–13.  
665 <https://doi.org/10.1038/s41598-017-02922-7>

- 666 Kurth R, Villringer K, Curio G, et al (2000) fMRI shows multiple somatotopic digit  
667 representations in human primary somatosensory cortex. *Neuroreport* 11:1487–1491.  
668 <https://doi.org/10.1097/00001756-200005150-00026>
- 669 Lachnit H, Pieper W (1990) Speed and accuracy effects of fingers and dexterity in 5-choice  
670 reaction tasks. *Ergonomics* 33:1443–1454. <https://doi.org/10.1080/00140139008925345>
- 671 Lee AT, Glover GH, Meyer CH (1995) Discrimination of Large Venous Vessels in Time-  
672 Course Spiral Blood-Oxygen-Level-Dependent Magnetic-Resonance Functional  
673 Neuroimaging. *Magn Reson Med*. <https://doi.org/10.1002/mrm.1910330602>
- 674 Lindquist MA, Meng Loh J, Atlas LY, Wager TD (2009) Modeling the hemodynamic response  
675 function in fMRI: efficiency, bias and mis-modeling. *Neuroimage* 45:S187–S198.  
676 <https://doi.org/10.1016/j.neuroimage.2008.10.065>
- 677 Maldjian JA, Gottschalk A, Patel RS, et al (1999) The sensory somatotopic map of the  
678 human hand demonstrated at 4 Tesla. *Neuroimage* 10:55–62.  
679 <https://doi.org/10.1006/nimg.1999.0448>
- 680 Markwardt CB (2009) Non-linear Least-squares Fitting in IDL with MPFIT. *Astron Data Anal*  
681 *Softw Syst XVIII ASP Conf Ser* 411:251. <https://doi.org/citeulike-article-id:4067445>
- 682 Martuzzi R, van der Zwaag W, Farthouat J, et al (2014) Human finger somatotopy in areas  
683 3b, 1, and 2: A 7T fMRI study using a natural stimulus. *Hum Brain Mapp* 35:213–226.  
684 <https://doi.org/10.1002/hbm.22172>
- 685 Merkel C, Hopf JM, Schoenfeld MA (2018) Spatial elongation of population receptive field  
686 profiles revealed by model-free fMRI back-projection. *Hum Brain Mapp* 39:2472–2481.  
687 <https://doi.org/10.1002/hbm.24015>
- 688 Miller KD, Pinto DJ, Simons DJ (2001) Processing in layer 4 of the neocortical circuit: New  
689 insights from visual and somatosensory cortex. *Curr Opin Neurobiol* 11:488–497.  
690 [https://doi.org/10.1016/S0959-4388\(00\)00239-7](https://doi.org/10.1016/S0959-4388(00)00239-7)
- 691 Mountcastle VB, LaMotte RH, Giancarlo C (1972) Detection thresholds for stimuli in humans  
692 and monkeys: Comparison with threshold events in mechanoreceptive afferent nerve  
693 fibers innervating the monkey hand. *J Neuroimaging* 35:122–136
- 694 Nelson AJ, Chen R (2008) Digit somatotopy within cortical areas of the postcentral gyrus in  
695 humans. *Cereb Cortex* 18:2341–2351. <https://doi.org/10.1093/cercor/bhm257>
- 696 Nelson AJ, Staines WR, Graham SJ, McIlroy WE (2004) Activation in SI and SII; The

- 697 influence of vibrotactile amplitude during passive and task-relevant stimulation. *Cogn*  
698 *Brain Res* 19:174–184. <https://doi.org/10.1016/j.cogbrainres.2003.11.013>
- 699 Pasterkamp E (1999) Mechanoreceptors in the glabrous skin of the human hand. *Arch*  
700 *Physiol Biochem* 107:338–341. <https://doi.org/10.1076/13813455199908107041qft338>
- 701 Paul RL, Merzenich M, Goodman H (1972) Representation of slowly and rapidly adapting  
702 cutaneous mechanoreceptors of the hand in brodmann's areas 3 and 1 of *Macaca*  
703 *Mulatta*. *Brain Res* 36:229–249. [https://doi.org/10.1016/0006-8993\(72\)90732-9](https://doi.org/10.1016/0006-8993(72)90732-9)
- 704 Pei YC, Denchev P V., Hsiao SS, et al (2009) Convergence of submodality-specific input  
705 onto neurons in primary somatosensory cortex. *J Neurophysiol* 102:1843–1853.  
706 <https://doi.org/10.1152/jn.00235.2009>
- 707 Pons TP, Garraghty PE, Cusick CG, Kaas JH (1985) The somatotopic organization of area 2  
708 in macaque monkeys. *J Comp Neurol*. <https://doi.org/10.1002/cne.902410405>
- 709 Puckett AM, Bollmann S, Junday K, et al (2020) Bayesian population receptive field modeling  
710 in human somatosensory cortex. *Neuroimage* 208:116465.  
711 <https://doi.org/10.1016/j.neuroimage.2019.116465>
- 712 Rowe MJ (2002) Synaptic transmission between single tactile and kinaesthetic sensory  
713 nerve fibers and their central target neurones. *Behav Brain Res* 135:197–212.  
714 [https://doi.org/10.1016/S0166-4328\(02\)00166-3](https://doi.org/10.1016/S0166-4328(02)00166-3)
- 715 Ryun S, Kim JS, Lee H, Chung CK (2017) Tactile Frequency-Specific High-Gamma Activities  
716 in Human Primary and Secondary Somatosensory Cortices. *Sci Rep* 7:1–10.  
717 <https://doi.org/10.1038/s41598-017-15767-x>
- 718 Saal HP, Bensmaia SJ (2014) Touch is a team effort: Interplay of submodalities in cutaneous  
719 sensibility. *Trends Neurosci* 37:689–697. <https://doi.org/10.1016/j.tins.2014.08.012>
- 720 Saal HP, Harvey MA, Bensmaia SJ (2015) Rate and timing of cortical responses driven by  
721 separate sensory channels. *Elife* 4:1–16. <https://doi.org/10.7554/eLife.10450>
- 722 Sánchez-Panchuelo RM, Besle J, Mougin O, et al (2014) Regional structural differences  
723 across functionally parcellated Brodmann areas of human primary somatosensory  
724 cortex. *Neuroimage* 93:221–230. <https://doi.org/10.1016/j.neuroimage.2013.03.044>
- 725 Sanchez-Panchuelo RM, Francis S, Bowtell R, Schluppeck D (2010) Mapping human  
726 somatosensory cortex in individual subjects with 7T functional MRI. *J Neurophysiol*  
727 103:2544–2556. <https://doi.org/10.1152/jn.01017.2009>

- 728 Sanchez Panchuelo RM, Besle J, Schluppeck D, et al (2018) Somatotopy in the Human  
729 Somatosensory System. *Front Hum Neurosci* 12:1–14.  
730 <https://doi.org/10.3389/fnhum.2018.00235>
- 731 Schellekens W, Petridou N, Ramsey NF (2018) Detailed somatotopy in primary motor and  
732 somatosensory cortex revealed by Gaussian population receptive fields. *Neuroimage*  
733 179:337–347. <https://doi.org/10.1016/j.neuroimage.2018.06.062>
- 734 Schwabe L, Obermayer K, Angelucci A, Bressloff PC (2006) The role of feedback in shaping  
735 the extra-classical receptive field of cortical neurons: A recurrent network model. *J*  
736 *Neurosci* 26:9117–9129. <https://doi.org/10.1523/JNEUROSCI.1253-06.2006>
- 737 Schwark HD, Jones EG (1989) The distribution of intrinsic cortical axons in area 3b of cat  
738 primary somatosensory cortex. *Exp Brain Res* 78:501–513.  
739 <https://doi.org/10.1007/BF00230238>
- 740 Schweizer R, Voit D, Frahm J (2008) Finger representations in human primary  
741 somatosensory cortex as revealed by high-resolution functional MRI of tactile  
742 stimulation. *Neuroimage* 42:28–35. <https://doi.org/10.1016/j.neuroimage.2008.04.184>
- 743 Simons SB, Tannan V, Chiu J, et al (2005) Amplitude-dependency of response of SI cortex  
744 to flutter stimulation. *BMC Neurosci* 6:1–14. <https://doi.org/10.1186/1471-2202-6-43>
- 745 Smith AT, Singh KD, Williams AL, Greenlee MW (2001) Estimating receptive field size from  
746 fMRI data in human striate and extrastriate visual cortex. *Cereb Cortex* 11:1182–90
- 747 Sur M, Merzenich MM, Kaas JH (1980) Magnification, receptive-field area, and  
748 “hypercolumn” size in areas 3b and 1 of somatosensory cortex in owl monkeys. *J*  
749 *Neurophysiol* 44:295–311. <https://doi.org/10.1152/jn.1980.44.2.295>
- 750 Suzuki M, Wasaka T, Inui K, Kakigi R (2013) Reappraisal of field dynamics of motor cortex  
751 during self-paced finger movements. *Brain Behav* 3:747–762.  
752 <https://doi.org/10.1002/brb3.186>
- 753 Tal Z, Geva R, Amedi A (2017) Positive and Negative Somatotopic BOLD Responses in  
754 Contralateral Versus Ipsilateral Penfield Homunculus. *Cereb Cortex* 27:962–980.  
755 <https://doi.org/10.1093/cercor/bhx024>
- 756 Tamè L, Moles A, Holmes NP (2014) Within, but not between hands interactions in  
757 vibrotactile detection thresholds reflect somatosensory receptive field organization.  
758 *Front Psychol* 5:1–9. <https://doi.org/10.3389/fpsyg.2014.00174>

- 759 Vallbo AB, Johansson RS (1984) Properties of cutaneous mechanoreceptors in the human  
760 hand related to touch sensation. *Hum Neurobiol* 3:3–14
- 761 Van Boven RW, Ingeholm JE, Beauchamp MS, et al (2005) Tactile form and location  
762 processing in the human brain. *Proc Natl Acad Sci U S A* 102:12601–12605.  
763 <https://doi.org/10.1073/pnas.0505907102>
- 764 Van de Moortele P-F, Auerbach EJ, Olman C, et al (2009) T1 weighted brain images at 7  
765 Tesla unbiased for proton density, T2\* contrast and RF coil receive B1 sensitivity with  
766 simultaneous vessel visualization. *Neuroimage* 46:432–446.  
767 <https://doi.org/10.1016/j.neuroimage.2009.02.009>
- 768 Van Essen DC, Maunsell JHR (1983) Hierarchical organization and functional streams in the  
769 visual cortex. *Trends Neurosci* 6:370–375
- 770 Vega-Bermudez F, Johnson KO (2001) Differences in spatial acuity between digits.  
771 *Neurology*. <https://doi.org/10.1212/WNL.56.10.1389>
- 772 Wagstyl K, Ronan L, Goodyer IM, Fletcher PC (2015) Cortical thickness gradients in  
773 structural hierarchies. *Neuroimage* 111:241–250.  
774 <https://doi.org/10.1016/j.neuroimage.2015.02.036>
- 775 Wandell BA, Winawer J (2015) Computational neuroimaging and population receptive fields.  
776 *Trends Cogn Sci* 19:349–357. <https://doi.org/10.1016/j.tics.2015.03.009>
- 777 Welbourne LE, Morland AB, Wade AR (2018) Population receptive field (pRF)  
778 measurements of chromatic responses in human visual cortex using fMRI. *Neuroimage*  
779 167:84–94. <https://doi.org/10.1016/j.neuroimage.2017.11.022>
- 780 Whitehead K, Papadelis C, Laudiano-Dray MP, et al (2019) The emergence of hierarchical  
781 somatosensory processing in late prematurity. *Cereb Cortex* 29:2245–2260.  
782 <https://doi.org/10.1093/cercor/bhz030>

783

784

785 **Figure legends**

786 Figure 1

787 pRF model timeseries

788 (A) Figure shows the effect of increasing pRF size on modeled timeseries. Left image shows  
789 model with pRF center = 1 (index finger, yellow bar), pRF size = 0.5 (finger units). Middle  
790 image: pRF center = 1, pRF size = 1.5. Right image: pRF center = 1, pRF size = 2.5. The  
791 model timeseries are convolved with the average HRF from the HRF experiment and the  
792 colored bars denote the model onset time for each of the fingertip conditions, see hand icon.  
793 (B) Fitted pRF timeseries (black) for one example vertex and the corresponding acquired  
794 fMRI timeseries (pink) are shown. For visibility, only a part of the complete timeseries is  
795 shown. The onsets of the fingertip stimulation conditions are represented by the colored  
796 bars, see also hand icon. This particular vertex was acquired from subject 4, BA1, 190 Hz,  
797 and was fitted with a model with pRF center= 2.74 (between index and middle finger) and  
798 pRF size = 1.70 finger units.

799 Figure 2

800 Title: Fingertip somatotopy

801 (A) Single subject pRF centers following 190 Hz vibrotactile stimulation are presented on a  
802 pial surface and flattened surface (circle). The cortical coordinates along the dorsoventral  
803 axis plotted against the pRF centers are shown for all three Brodmann areas. For the pRF  
804 centers, 1=thumb, 2=index finger, 3=middle finger, 4=ring finger, 5=little finger, which is also  
805 indicated by the colors in the scatterplot and the hand icon. (B) Group average of cortical  
806 coordinates along the dorsoventral axis plotted against the mean pRF center per fingertip  
807 1=thumb, 2=index finger, 3=middle finger, 4=ring finger, 5=little finger). Shaded area  
808 represents standard error of the mean across subjects. Different symbols represent different  
809 vibrational frequencies.

810

811 Figure 3

812 Title: pRF center maps

813 The pRF centers are displayed on flattened cortical surfaces for all subjects (s1-s8). Rows  
814 depict the different frequencies of vibrotactile stimulation (30 Hz, 110 Hz & 190 Hz). Borders  
815 between Brodmann areas are denoted by the white solid line. The base of the central sulcus



816 is shown by the white downward triangle, and the crown of the postcentral gyrus is indicated  
817 by the black upward triangle. Correspondence of pRF center and fingertip is denoted by the  
818 hand icon.

819

820 Figure 4

821 Title: pRF size maps

822 The pRF sizes are displayed on flattened cortical surfaces for all subjects (s1-s8). Rows  
823 depict the different frequencies of vibrotactile stimulation (30 Hz, 110 Hz & 190 Hz). Borders  
824 between Brodmann areas are denoted by the white solid line. The base of the central sulcus  
825 is shown by the white downward triangle, and the crown of the postcentral gyrus is indicated  
826 by the black upward triangle.

827

828 Figure 5

829 Title: Average pRF sizes and BOLD amplitudes

830 Figure shows the average pRF size across subjects for Brodmann areas (A), fingertip  
831 representation (B), and vibrotactile frequency (C), as well as the corresponding estimated  
832 BOLD signal amplitude (D-F). Error bars denote the standard error of the mean across  
833 subjects.

834

835 Figure 6

836 Title: Hemodynamic response functions

837 Estimated hemodynamic response functions per Brodmann area. The areas denote one  
838 standard error of the mean across subjects.

839

840

841
